# Supplementary material
Source: Springer Nature journal article supplement (https://www.springermedizin.de/resource/supplementary/12889_2011_4417_MOESM3_ESM.pdf/9492562)

## Self-rated health, Women

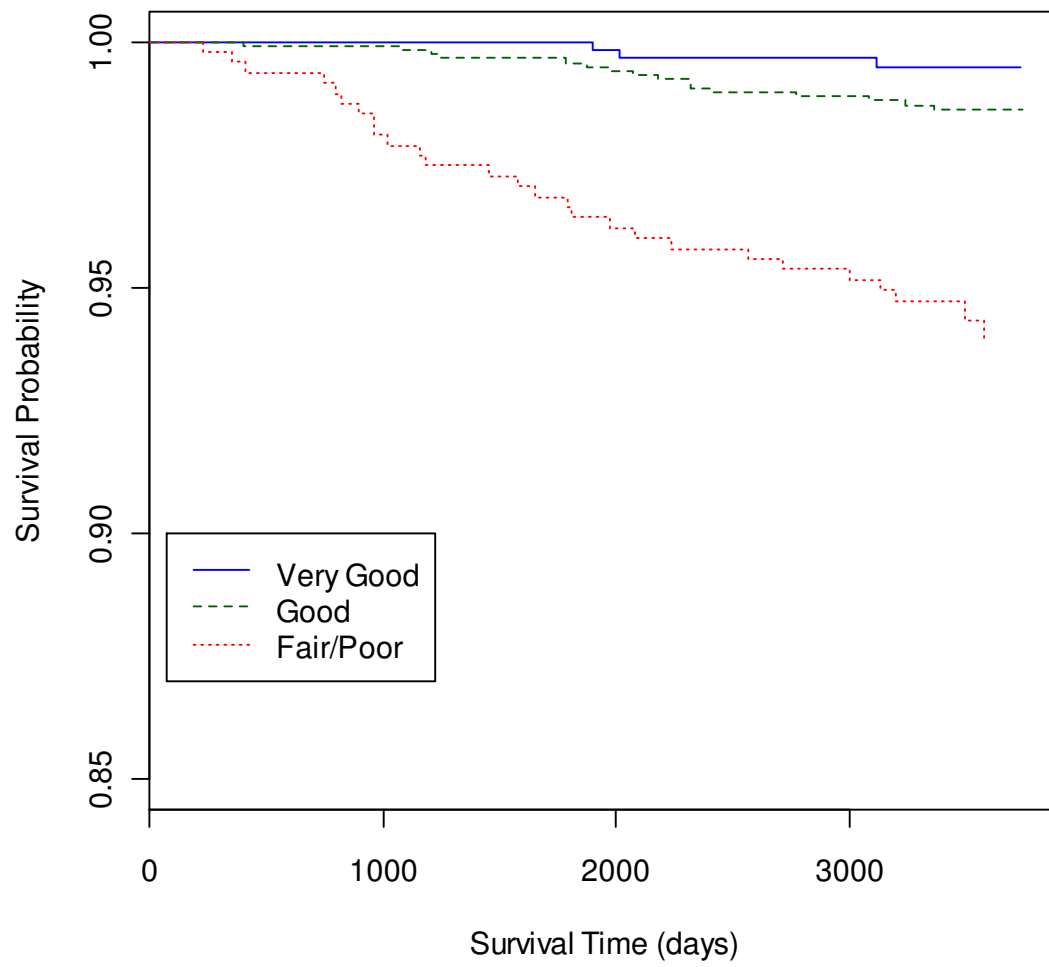

Supplement: MOESM3 [file 9492562]
